# Supplementary material for: Crown-of-Thorns Sea Star Acanthaster cf. solaris Has Tissue-Characteristic Microbiomes with Potential Roles in Health and Reproduction
Source: PubMed Central journal article supplement (PMC6007096; doi:10.1128/aem.00181-18), 2018-06-18
Supplement: AEM.00181-18_zam013188596s1.pdf [file AEM.00181-18_zam013188596s1.pdf]

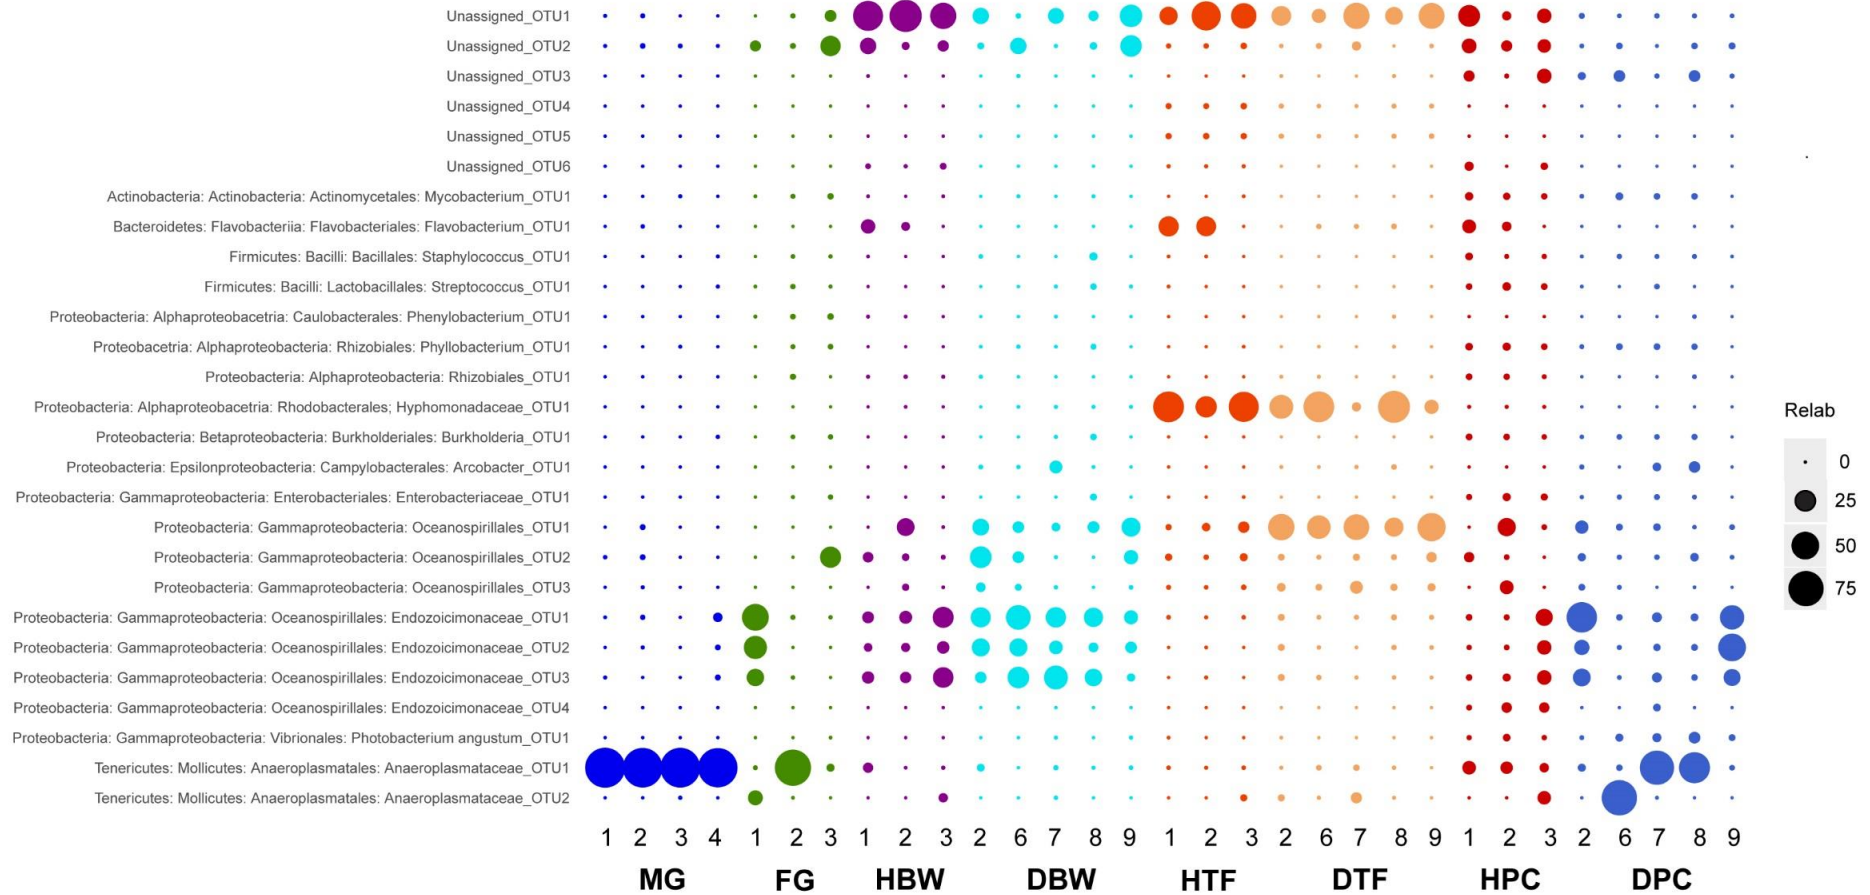

**FIG. S1** Relative abundance of OTUs identified by SIMPER as explaining  $> 2\%$  of the dissimilarity between samples, or identified by the function signassoc to be significantly associated with a specific tissue or health state. The OTU label reflects the taxonomic assignment given by the QIIME pipeline. Abbreviations: MG: male gonads; FG: female gonads; HBW: healthy body wall; DBW: diseased body wall; HTF: healthy tube feet; DTF: diseased tube feet; HPC: healthy pyloric caeca; DPC: diseased pyloric caeca. The number identifies the sampled individual.

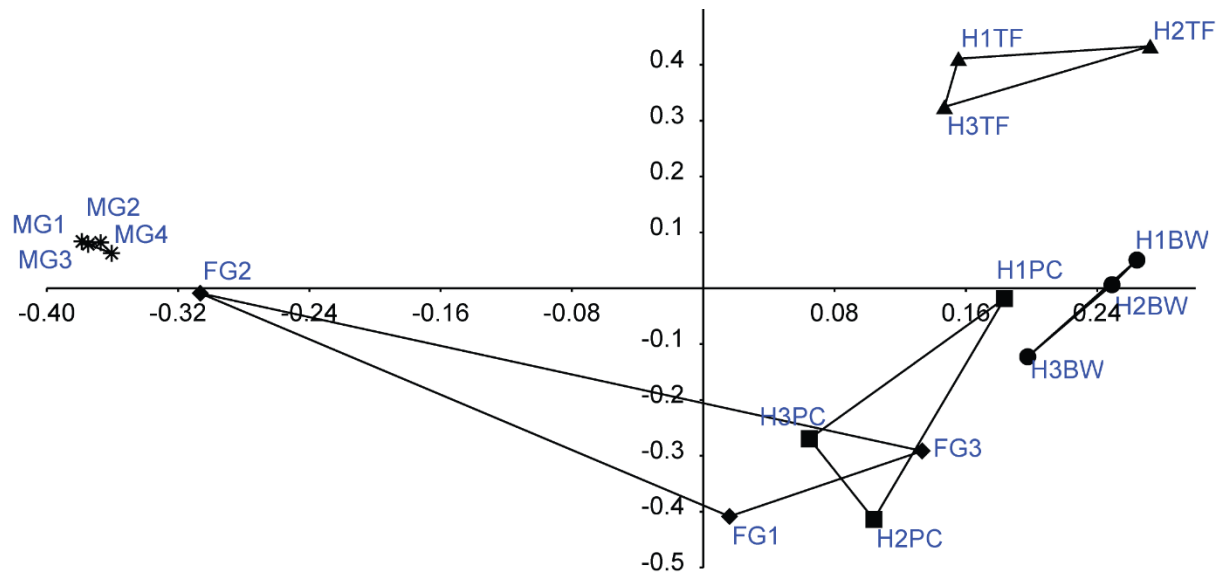

**FIG. S2** Principal coordinates analysis (PCoA) plot for healthy *Acanthaster cf. solaris* tissue samples based on weighted Unifrac distances. Abbreviations: HBW: healthy body wall; HTF: healthy tube feet; HPC: healthy pyloric caeca; FG: female gonads; MG: male gonads.

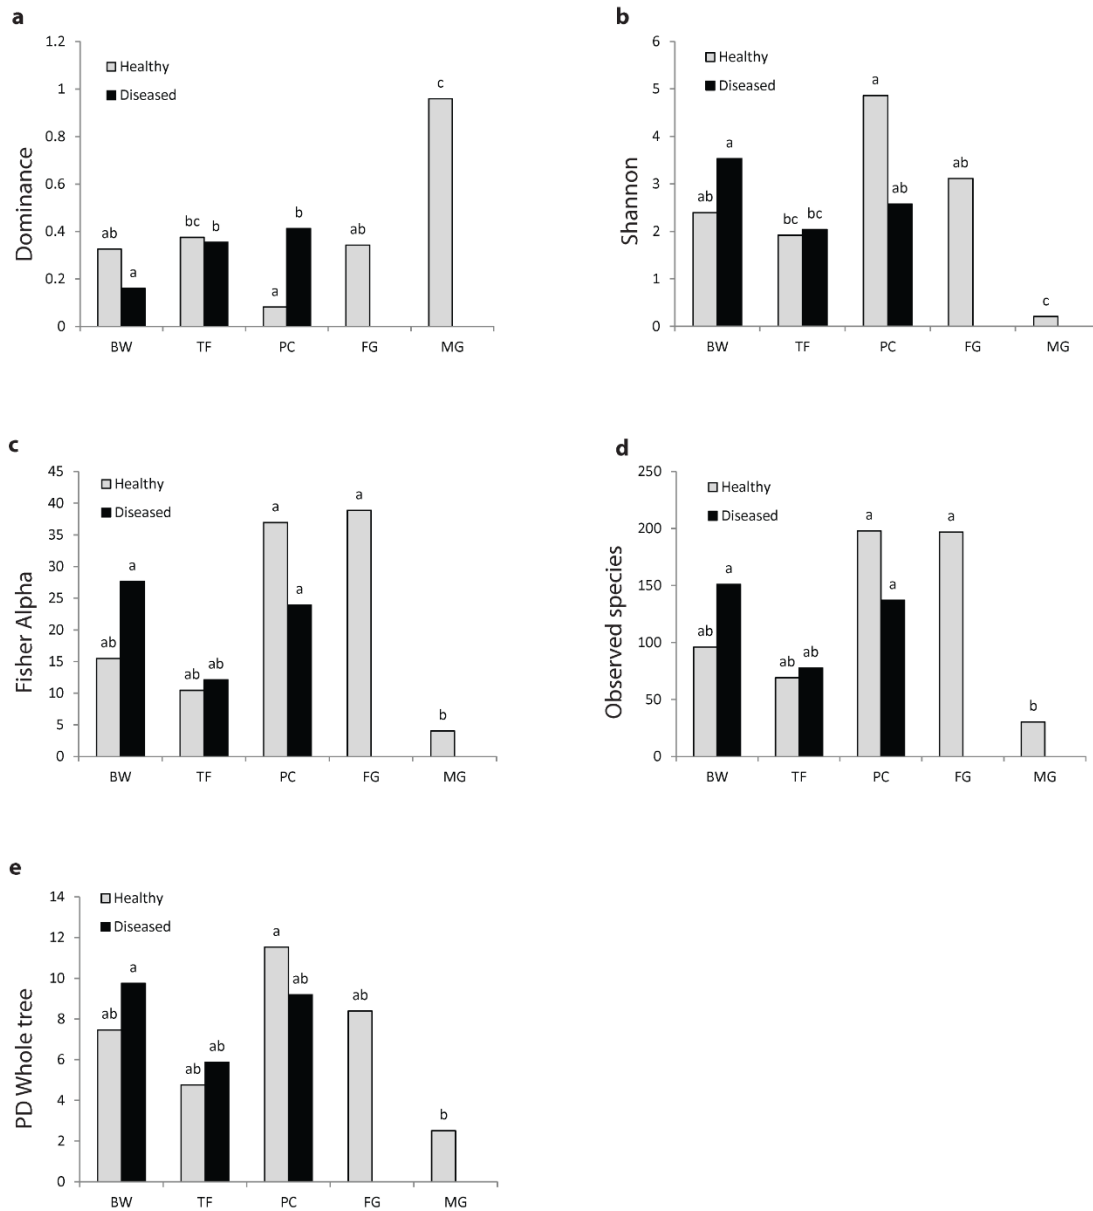

**FIG S3** Alpha diversity measures for healthy and diseased *Acanthaster cf. solaris* tissues.

Letters indicate which samples were statistically different (van der Waal;  $p < 0.05$ ).

Abbreviations: BW: body wall; TF: tube feet; PC: pyloric caeca; FG: female gonads; MG: male gonads.



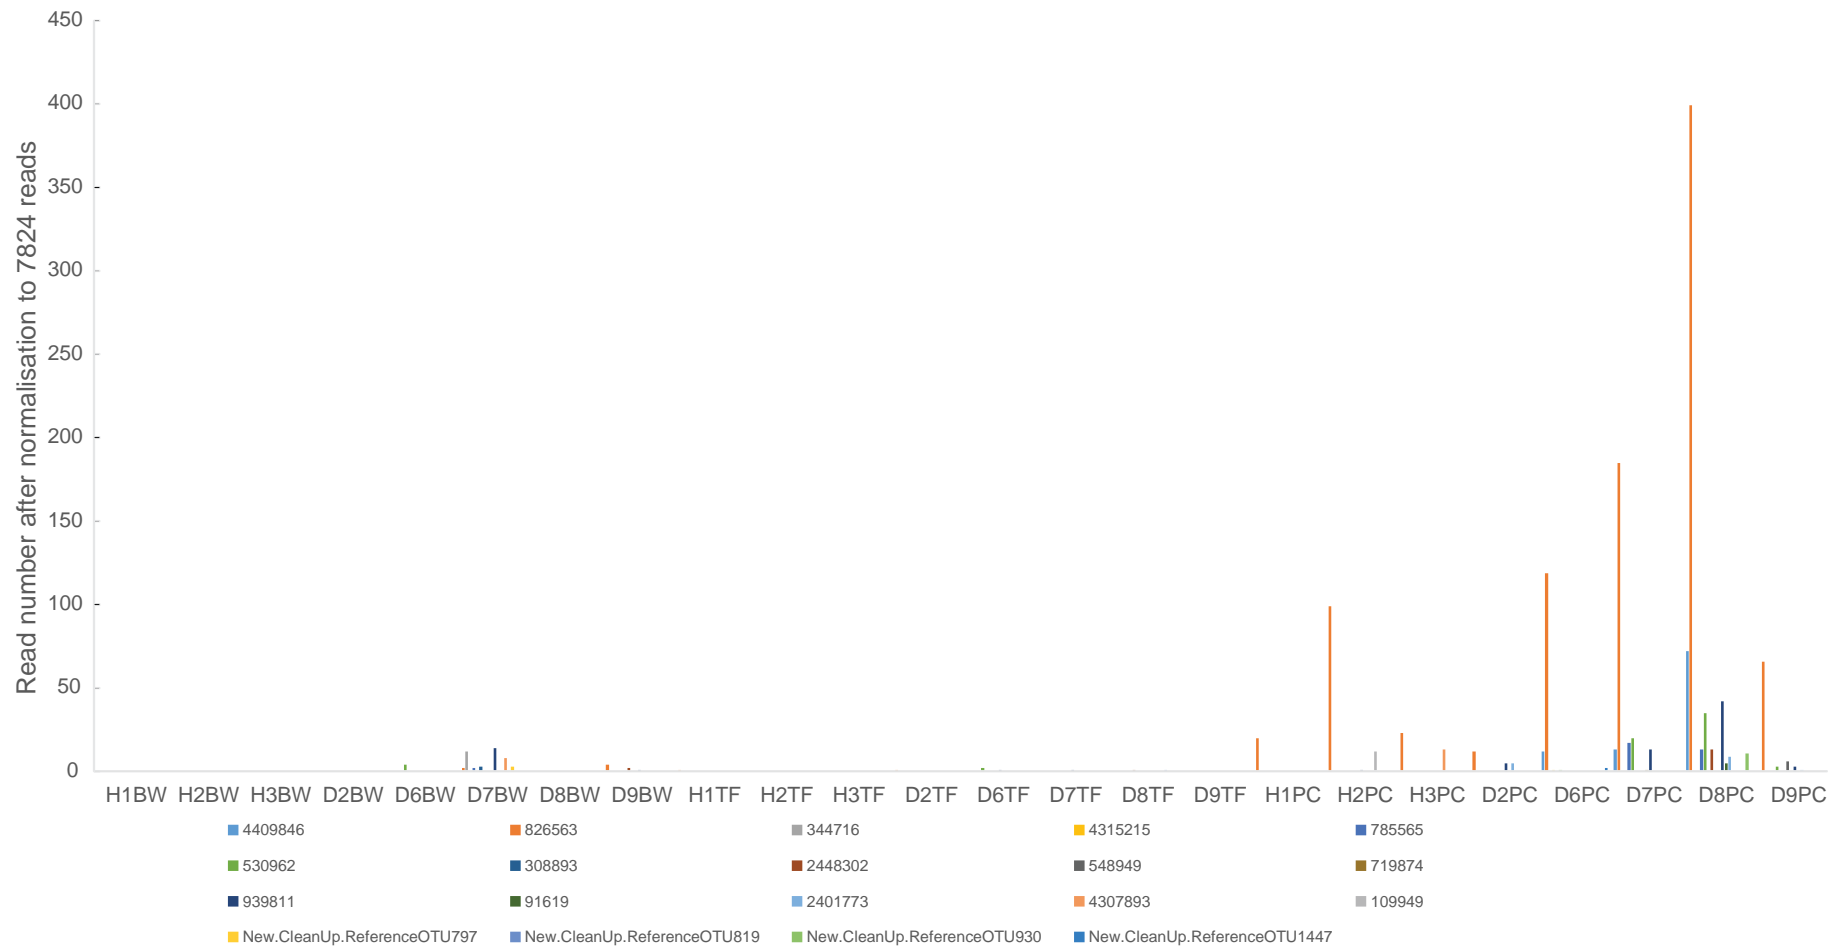

**FIG S5** Read numbers of OTUs classified by QIIME as belonging to the family Vibrionaceae in resampled dataset (total reads 7824 per sample).

**TABLE S1** Tissue characteristic OTUs as determined by SIMPER and signassoc analyses. OTU labels reflect taxonomic assignment by the QIIME pipeline.

| OTU label                                  | All healthy           | BW vs TF     | BW vs PC    | BW vs FG    | BW vs MG     | TF vs PC    | TF vs FG    | TF vs MG     | PC vs FG    | PC vs MG    | FG vs MG     |
|--------------------------------------------|-----------------------|--------------|-------------|-------------|--------------|-------------|-------------|--------------|-------------|-------------|--------------|
| Unassigned_OTU1                            | BW: 6.3%, *           | BW: 3.3%, -  | BW: 4.2%, - | BW: 8.5%, - | BW: 14.4%, - | TF: 2.7%, - | TF: 6.2%, - | TF: 12.7%, - | PC: 2.3%, - | PC: 3.3%, - |              |
| Unassigned_OTU2                            | PC: 2.2%, -           | BW: 3.4%, -  |             |             | BW: 4.0%, -  | PC: 2.0%, - |             |              |             | PC: 2.5%, - | FG: 3.1%, -  |
| Unassigned_OTU3                            | PC: <2%, **           |              | PC: 2.0%, - |             |              |             |             |              |             | PC: 2.1%, - |              |
| Unassigned_OTU4                            | TF: <2%, **           |              |             |             |              |             |             |              |             |             |              |
| Unassigned_OTU5                            | TF: <2%, **           |              |             |             |              |             |             |              |             |             |              |
| Actinomycetales: Mycobacterium             | PC: <2%, *            |              |             |             |              |             |             |              |             |             |              |
| Flavobacteriales: Flavobacterium           | TF: 2.8%, -           | TF: 5.2%, -  |             |             | BW: 2.8%, -  | TF: 2.5%, - | TF: 3.7%, - | TF: 6.7%, -  |             |             |              |
| Bacillales: Staphylococcus                 | PC: <2%, **           |              |             |             |              |             |             |              |             |             |              |
| Lactobacillales: Streptococcus             | PC: <2%, **           |              |             |             |              |             |             |              |             |             |              |
| Caulobacterales: Phenylobacterium          | FG: <2%, **           |              |             |             |              |             |             |              |             |             |              |
| Rhizobiales: Phyllobacterium               | <b>PC: &lt;2%, **</b> |              |             |             |              |             |             |              |             |             |              |
| Rhizobiales                                | <b>PC: &lt;2%, *</b>  |              |             |             |              |             |             |              |             |             |              |
| Rhodobacterales; Hyphomonadaceae           | TF: 4.3%, **          | TF: 13.5%, - |             |             |              | TF: 6.3%, - | TF: 8.1%, - | TF: 15.1%    |             |             |              |
| Burkholderiales: Burkholderia              | PC: <2%, **           |              |             |             |              |             |             |              |             |             |              |
| Enterobacteriales: Enterobacteriaceae      | PC: <2%, **           |              |             |             |              |             |             |              |             |             |              |
| Oceanospirillales_OTU1                     |                       | TF: 3.6%, -  |             |             | BW: 2.9%, -  |             |             | TF: 2.9%, -  |             |             |              |
| Oceanospirillales_OTU2                     |                       |              |             | FG: 2.2%, - |              |             |             |              |             |             |              |
| Oceanospirillales: Endozoicimonaceae_OTU1  | BW: 3.4%, -           | BW: 6.2%, -  | BW: 2.2%, - | BW: 3.9%, - | BW: 5.7%, -  |             | FG: 3.8%, - |              | FG: 2.5%, - |             | FG: 5.6%, -  |
| Oceanospirillales: Endozoicimonaceae_OTU2  | FG, BW: 2.5%, -       | BW: 3.7%, -  |             | BW: 3.5%, - | BW: 3.4%, -  |             | FG: 3.3%, - |              | FG: 2.3%, - |             | FG: 4.8%, -  |
| Oceanospirillales: Endozoicimonaceae_OTU3  | BW: 2.8%, -           | BW: 6.4%, -  |             | BW: 2.8%, - | BW: 6.1%, -  |             | FG: 2.4%, - |              |             |             | FG: 3.4%, -  |
| Oceanospirillales: Endozoicimonaceae_OTU4  | PC: <2%, **           |              |             |             |              |             |             |              |             |             |              |
| Vibrionales: Photobacterium angustum       | PC: <2%, **           |              |             |             |              |             |             |              |             |             |              |
| Anaeroplasmatales: Anaeroplasmataceae_OTU1 | MG: 9.0%, ***         |              |             | FG: 3.8%, - | MG: 19.1%, - |             | FG: 3.4%, - | MG: 22.1%, - | FG: 2.8%, - | MG: 8.3%, - | MG: 11.8%, - |
| Anaeroplasmatales: Anaeroplasmataceae_OTU2 |                       |              |             | FG: 2.0%, - |              |             |             |              |             |             | FG: 2.8%, -  |

Entry format: tissue with highest relative abundance: percentage of dissimilarity explained by SIMPER, significance level in signassoc analysis.

Abbreviations: BW: body wall; TF: tube feet; PC: pyloric caeca; FG: female gonads; MG: male gonads; -: p>0.05; \*: p<0.05; \*\*: p<0.01; \*\*\*: p<0.005.

**TABLE S2** BLAST analysis results for representative sequences of OTUs identified by SIMPER as explaining > 2% of the dissimilarity between samples, or identified by signassoc to be significantly associated with a tissue or health status.

| OTU label                                  | QIIME id (id to template)         | BLAST nr best matches (acc. no.; seq. id.; host or environment)                                                                                                                     | BLAST ref_seq best matches (acc. no.; seq. id.; isolation source)                                                                                                                                        |
|--------------------------------------------|-----------------------------------|-------------------------------------------------------------------------------------------------------------------------------------------------------------------------------------|----------------------------------------------------------------------------------------------------------------------------------------------------------------------------------------------------------|
| Unassigned_OTU1                            | Unassigned (84.8%)                | Unc. spirochete, isolate SRODG048 (FM995181.1; 86%; oyster <i>Saccostrea glomerata</i> )<br>Unc. Spirochaetes, clone OTU75 (KP174132.1; 86%; gorgonian <i>Muricea fruticosa</i> )   | Candidatus <i>Hepatoplasma crinochetorum</i> (NR_121778.1; 93%; isopod <i>Armadillidium vulgare</i> )<br><i>Brachyspira intermedia</i> strain PWS/A (NR_102932.1; 93%; weaned pigs with diarrhea)        |
| Unassigned_OTU2                            | Unassigned (90.4%)                | Unc. Spirochaetes, clone OTU6 (KP174129.1; 93%; zoanthid <i>Parazoanthus lucificum</i> )<br>Unc. organism clone ctg_CGOAA65TR (DQ395458.1; 92%; deep-sea octocoral)                 | <i>Spirochaeta americana</i> strain ASpG1 (NR_028820.1; 89%; soda lake sediment)<br><i>Spirochaeta alkalica</i> strain Z-7491 (NR_026301.1; 88%; cyanobacterial mat in alkaline lake)                    |
| Unassigned_OTU3                            | Unassigned (88%)                  | Unc. bacterium clone 4132B37 (EU555133.1; 91%; hydrothermal vent)<br>Unc. epsilon proteobacterium ML320J-2 (AF458287.1; 91%; alkaline hypersaline lake)                             | <i>Nitratiruptor tergarcus</i> strain MI55-1 (NR_041023.1; 90%; deep-sea hydrothermal system)<br><i>Campylobacter lari</i> RM2100 strain RM2100 (NR_074555.1; 89%; <i>homo sapiens</i> clinical isolate) |
| Unassigned_OTU4                            | Unassigned (82.8%)                | Uncultured alpha proteobacterium clone DPC033 (DQ269093.1; 88%; <i>Delisea pulchra</i> )<br>Uncultured bacterium clone denovo7567 (KU637957.1; 88%; red algae <i>Asparagopsis</i> ) | <i>Hyphomonas oceanitis</i> strain SCH-89 (NR_024941.1; 96%; Baltic sea)<br><i>Hyphomonas hirschiana</i> strain VP-5 (NR_024939.1; 96%; Galapagos vent area)                                             |
| Unassigned_OTU5                            | Unassigned (81.2%)                | Uncultured <i>Synechococcus</i> sp. clone JL-WNPG-T40 (AY664136.1; 83%; coastal water)<br>Uncultured bacterium clone denovo31172 (KU629690.1; 89%; red algae <i>Asparagopsis</i> )  | <i>Virgibacillus kekensis</i> strain YIM kkn16 (NR_042744.1; 88%; Salt Lake Keke)<br><i>Weissella soli</i> strain Mi268 (NR_025642.1; 87%; soil)                                                         |
| Unassigned_OTU6                            | Unassigned (77.6%)                | Uncultured bacterium clone LKC09_005_13 (JX521528.1; 91%; terrestrial sulfidic spring)<br>Uncultured bacterium clone (HQ839406.1, 89%, hydrothermal vent)                           | <i>Schleiferia thermophila</i> strain TU-20 (NR_117928.1, 88%, hot spring)<br><i>Draconibacterium sediminis</i> strain MCCC 1A00734 (NR_136493.1, 89%, river sediment)                                   |
| Actinomycetales; Mycobacterium             | <i>Mycobacterium</i> (95.2%)      | <i>Mycobacterium abscessus</i> subsp. <i>bolletii</i> strain Y9 (KU861820.1; 100%; tap water)<br><i>Mycobacterium chelonae</i> strain 96-1705 (KT779789.1; 100%; foot biopsy)       | <i>Mycobacterium saopaulense</i> strain EPM10906 (NR_145859.1; 100%; cornea)<br><i>Mycobacterium abscessus</i> strain ATCC 19977 (NR_114658.1; 100%)                                                     |
| Anaeroplasmatales; Anaeroplasmataceae_OTU1 | <i>Anaeroplasmataceae</i> (90.8%) | Unc. bacterium, clone LBDT0517-A (HE663394.1; 91%; chiton <i>Leptochiton boucheti</i> )<br>Unc. bacterium, clone LBDT7266 (HE663315.1; 91%; chiton <i>Leptochiton boucheti</i> )    | <i>Mycoplasma cottewii</i> strain VIS (NR_026036.1; 85%; goat <i>Capra hircus</i> )<br><i>Spiroplasma leucomae</i> strain SMA (NR_104721.1; 89%; satin moth larvae <i>Stilpnotia salicis</i> )           |
| Anaeroplasmatales; Anaeroplasmataceae_OTU2 | <i>Anaeroplasmataceae</i> (90.8%) | Unc. bacterium, clone LBDT0517-A (HE663394.1; 91%; chiton <i>Leptochiton boucheti</i> )                                                                                             | <i>Mycoplasma putrefaciens</i> Mput9231 (NR_103942.1; 83%; goat <i>Capra hircus</i> )                                                                                                                    |

|                                      |                                      |                                                                                                                                                                                        |                                                                                                                                                                                                             |
|--------------------------------------|--------------------------------------|----------------------------------------------------------------------------------------------------------------------------------------------------------------------------------------|-------------------------------------------------------------------------------------------------------------------------------------------------------------------------------------------------------------|
|                                      |                                      | Unc. bacterium, clone LBDT7266<br>(HE663315.1; 91%; chiton <i>Leptochiton boucheti</i> )                                                                                               | <i>Mycoplasma putrefaciens</i> KS1<br>(NR_025971.1; 83%; goat <i>Capra hircus</i> )                                                                                                                         |
| Bacillales; Staphylococcus           | <i>Staphylococcus</i><br>(96.4%)     | <i>Lactobacillus plantarum</i> strain CAU:563 (MF355142.1, 100%, fermented milk)<br><i>Staphylococcus epidermidis</i> strain AS9 (MF286538.1, 100%, mouse skin)                        | <i>Staphylococcus epidermidis</i> strain NBRC 100911<br>(NR_113957.1, 100%)<br><i>Staphylococcus saccharolyticus</i> strain JCM 1768<br>(NR_113405.1, 100%)                                                 |
| Burkholderiales; Burkholderia        | <i>Burkholderia</i><br>(91.6%)       | <i>Burkholderia</i> sp. strain Bac148 (KX641532.1, 100%, root tissues)<br><i>Burkholderia</i> sp. symbiont clone (LT221702.1, 100%, stinkbug <i>Dicranocephalus lateralis</i> gut)     | <i>Burkholderia peredens</i> strain LMG 29314 (NR_145606.1, 100%)<br><i>Burkholderia turbans</i> strain LMG 29316 (NR_145604.1, 100%)                                                                       |
| Campylobacterales; Arcobacter        | <i>Arcobacter</i><br>(86.8%)         | <i>Campylobacteraceae</i> bacterium FA150 (KU143707.1; 99%; sediment)<br>Unc. bacterium clone DLPYS_MD03_095 (KC852778.1; 99%; abscess on scallop <i>Patinopecten yessoensis</i> )     | <i>Arcobacter aquimarinus</i> strain W63<br>(NR_136421.1; 99%; sea water)<br><i>Arcobacter cloacae</i> strain SW28-13<br>(NR_117570.1; 99%; sewage)                                                         |
| Caulobacterales; Phenylobacterium    | <i>Phenylobacterium</i><br>(89.2%)   | Uncultured bacterium clone UA_79 (JX120449.1, 100%, subsurface aquifer sediment)<br>Uncultured organism (HQ809737.1, 100%, human gastrointestinal specimens)                           | <i>Phenylobacterium composti</i> strain 4T-6 (NR_044377.1, 99%, cotton waste compost)<br><i>Phenylobacterium lituiforme</i> strain Fail3 (NR_029117.1, 99%, subsurface aquifer)                             |
| Enterobactriales; Enterobacteriaceae | <i>Enterobacteriaceae</i><br>(95.6%) | <i>Escherichia coli</i> strain MWW (LC215416.1; 100%; waste water)<br><i>Shigella</i> sp. strain KIB7 (KY466922.1; 100%; river water)                                                  | <i>Citrobacter koseri</i> strain LMG 5519<br>(NR_117751.1; 100%; blood culture)<br><i>Trabulsiella odontotermis</i> strain Eant 3-9 (NR_043860.1; 100%; termite <i>Odontotermes formosanus</i> Shiraki gut) |
| Flavobacteriales; Flavobacterium     | Flavobacterium<br>(84%)              | Unc. <i>Flavobacteriaceae</i> clone 758_WTL (KP887599.1; 92%; coastal surface waters)<br>Unc. <i>Flavobacteriaceae</i> clone 0306_MLB20 (JQ515052.1; 92%; filtered seawater)           | <i>Actibacter sediminis</i> JC2129<br>(NR_044349.1; 88%; tidal flat sediment)<br><i>Namhaeicola litoreus</i> DPG-25<br>(NR_132282.1; 88%; seawater)                                                         |
| Lactobacillales; Streptococcus       | <i>Streptococcus</i><br>(92.4%)      | Uncultured bacterium clone OTU0118 (KY454989.1; 100%; coral <i>Acropora hemprichii</i> )<br>Uncultured bacterium clone denovo3254 (KU630575.1; 100%; red algae <i>Asparagopsis</i> )   | <i>Streptococcus tigurinus</i> strain AZ_3a<br>(NR_118234.1; 100%; blood culture)<br><i>Streptococcus oralis</i> strain ATCC 35037<br>(NR_116210.1; 100%; human mouth)                                      |
| Oceanospirillales_OTU1               | <i>Oceanospirillales</i><br>(94%)    | Unc. bacterium, clone C430/GW1046 (HG423475.1; 98%; sponge <i>Astrosclera willeyana</i> )<br>Unc. bacterium, clone C467/GW1046 (HG423531.1; 98%; sponge <i>Astrosclera willeyana</i> ) | <i>Kistimonas asteriae</i> KMD 001<br>(NR_116386.1; 98%; seastar <i>Asterias amurensis</i> skin)<br><i>Alcanivorax dieselolei</i> B5<br>(NR_074734.1; 96%; oil-contaminated surface water)                  |
| Oceanospirillales_OTU2               | <i>Oceanospirillales</i><br>(92%)    | Unc. bacterium clone JI4_16 (EU487857.1; 100%; lucinid <i>Phacoides pectinatus</i> )<br>Unc. bacterium clone JI4_12 (EU487853.1; 97%; lucinid <i>Phacoides pectinatus</i> )            | <i>Kistimonas scapharcae</i> A36<br>(NR_109422.1; 97%); dead ark clam <i>Scapharca broughtonii</i> )<br><i>Kistimonas asteriae</i> KMD 001<br>(NR_116386.1; 95%; seastar <i>Asterias amurensis</i> skin)    |



|                                              |                                        |                                                                                                                                                                                                                 |                                                                                                                                                                                                                                          |
|----------------------------------------------|----------------------------------------|-----------------------------------------------------------------------------------------------------------------------------------------------------------------------------------------------------------------|------------------------------------------------------------------------------------------------------------------------------------------------------------------------------------------------------------------------------------------|
| Oceanospirillales_OTU3                       | <i>Oceanospirillales</i><br>(92.8%)    | <i>Kistimonas asteriae</i> KMD 001<br>(NR_116386.1; 100%; seastar <i>Asterias amurensis</i> skin)<br><br><i>Kistimonas</i> sp. 1804<br>(KF444399.1; 99%; toxic Ribbon worm <i>Cephalothrix simula</i> )         | <i>Kistimonas asteriae</i> KMD 001<br>(NR_116386.1; 100%; seastar <i>Asterias amurensis</i> skin)<br><br><i>Kistimonas scapharcae</i> A36<br>(NR_109422.1; 98%; ark clam <i>Scapharca broughtonii</i> )                                  |
| Oceanospirillales;<br>Endozoicimonaceae_OTU1 | <i>Endozoicimonaceae</i><br>(92.4%)    | Unc. bacterium clone Apal_H17<br>(GU118072.1; 100%; coral <i>Acropora palmata</i> )<br><br>Unc. bacterium clone Apal_O13<br>(GU118076.1; 99%; coral <i>Acropora palmata</i> )                                   | <i>Endozoicomonas atrinae</i> WP70<br>(NR_134024.1; 97%; comb pen shell <i>Atrina pectinata</i> )<br><br><i>Endozoicomonas elysicola</i> MKT110<br>(NR_041264.1; 96%; sea slug <i>Elysia ornata</i> )                                    |
| Oceanospirillales;<br>Endozoicimonaceae_OTU2 | <i>Endozoicimonaceae</i><br>(92.8%)    | Unc. bacterium clone 1C227608<br>(EU799933.1; 100%; seawater)<br><br>Unc. bacterium clone Woods-Hole_a4129<br>(KF799373.1; 98%; tunicate <i>Ciona intestinalis</i> )                                            | <i>Endozoicomonas atrinae</i> WP70<br>(NR_134024.1; 97%; comb pen shell <i>Atrina pectinata</i> )<br><br><i>Endozoicomonas elysicola</i> MKT110<br>(NR_041264.1; 96%; sea slug <i>Elysia ornata</i> )                                    |
| Oceanospirillales;<br>Endozoicimonaceae_OTU3 | <i>Endozoicimonaceae</i><br>(88.4%)    | Unc. bacterium clone AT88<br>(FJ809513.1; 99%; coral <i>Acropora</i> sp.)<br><br>Unc. bacterium clone AT70<br>(FJ809495.1; 99%; coral <i>Acropora</i> sp.)                                                      | <i>Endozoicomonas euniceicola</i> EF212<br>(NR_109684.2; 93%; octocoral <i>Eunicea fusca</i> )<br><br><i>Endozoicomonas elysicola</i> MKT110<br>(NR_041264.1; 92%; sea slug <i>Elysia ornata</i> )                                       |
| Oceanospirillales;<br>Endozoicimonaceae_OTU4 | <i>Endozoicimonaceae</i><br>(91.6%)    | Unc. gamma proteobacterium clone C23<br>(DQ884170.1; 100%; ascidian <i>Cystodytes dellechiaiei</i> )<br><br>Unc. gamma proteobacterium clone C19<br>(DQ884169.1; 95%; ascidian <i>Cystodytes dellechiaiei</i> ) | <i>Endozoicomonas numazuensis</i> HC50<br>(NR_114318.1; 95%; sponge <i>Haplosclerida</i> gen. et sp.)<br><br><i>Endozoicomonas elysicola</i> MKT110<br>(NR_041264.1; 96%; sea slug <i>Elysia ornata</i> )                                |
| Rhizobiales                                  | <i>Rhizobiales</i><br>(87.6%)          | Uncultured <i>Xanthobacteraceae</i> bacterium clone 3.86P<br>(KP235996.1, 96%, soil)<br>Uncultured <i>Xanthobacteraceae</i> bacterium clone 3.107P<br>(KP235987.1, 96%, soil)                                   | <i>Devosia enhydra</i> (NR_104723.1, 93%, junction between ocean and freshwater lake)<br><i>Xanthobacter flavus</i> strain NBRC 14759 (NR_113665.1, 93%)                                                                                 |
| Rhizobiales;<br>Phyllobacterium              | <i>Phyllobacterium</i><br>(93.2%)      | Unc. bacterium clone 6h18<br>(HG531829.1; 100%; SHIME_human in vitro gut model)<br>Unc. <i>Phyllobacterium</i> sp. clone H12 (KF003163.1; 100%; grass carp <i>Ctenopharyngodon idellus</i> gut mucus)           | <i>Phyllobacterium ifriqiyense</i> strain STM 370<br>(NR_043192.1; 100%; root nodule of <i>Lathyrus numidicus</i> )<br><i>Phyllobacterium myrsinacearum</i> strain STM 948<br>(NR_043189.1; 100%; leaf nodule of <i>Ardisia crispa</i> ) |
| Rhodobacterales;<br>Hyphomonadaceae          | <i>Hyphomonadaceae</i><br>(89.2%)      | Unc. bacterium clone PSE5<br>(FJ393578.1; 96%; seastar <i>Patiriella</i> sp.)<br><br>Unc. bacterium clone PSE34<br>(FJ393607.1; 95%; seastar <i>Patiriella</i> sp.)                                             | <i>Hirschia maritima</i> GSW-2<br>(NR_116900.1; 92%; seawater)<br><br><i>Hirschia baltica</i> ATCC 49814<br>(NR_074121.1; 92%; brackish fjord water)                                                                                     |
| Vibrionales; Photobacterium<br>angustum      | <i>Photobacterium angustum</i> (97.6%) | <i>Vibrio</i> sp. strain Vcl_050<br>(KX279494.1; 100%; coral <i>Cladocora caespitose</i> )<br><i>Vibrio hyugaensis</i> strain 090810a<br>(NR_145569.1; 100%; seawater)                                          | <i>Vibrio alginolyticus</i> strain NBRC 15630 (NR_122060.1; 100%)<br><i>Vibrio parahaemolyticus</i> strain ATCC 17802<br>(NR_118569.1; 100%)                                                                                             |

**Table S3:** OTUs detected in somatic tissues of all healthy (n=3) and all diseased (n=5) individuals (total n=8).

|                                                | Body wall | Tube feet | Pyloric caeca |
|------------------------------------------------|-----------|-----------|---------------|
| Unassigned_OTU1                                | Y         | Y         | Y             |
| Unassigned_OTU2                                | Y         |           | Y             |
| Unassigned_OTU3                                |           |           | Y             |
| Unassigned_OTU4                                |           | Y         |               |
| Unassigned_OTU5                                |           | Y         |               |
| Unassigned_OTU7                                |           | Y         |               |
| Unassigned_OTU8                                |           | Y         |               |
| Unassigned_OTU9                                |           | Y         |               |
| Anaeroplasmatales: Anaeroplasmataceae_OTU1 (f) | Y         |           | Y             |
| Bacillales: Staphylococcus (g)                 |           |           | Y             |
| Caulobacterales: Caulobacteraceae (f)          |           |           | Y             |
| Oceanospirillales_OTU1 (o)                     |           | Y         |               |
| Oceanospirillales_OTU2 (o)                     |           | Y         |               |
| Oceanospirillales_OTU3 (o)                     |           | Y         |               |
| Oceanospirillales_OTU4 (o)                     |           | Y         |               |
| Oceanospirillales: Endozoicimonaceae_OTU1 (f)  | Y         | Y         | Y             |
| Oceanospirillales: Endozoicimonaceae_OTU2 (f)  | Y         |           | Y             |
| Oceanospirillales: Endozoicimonaceae_OTU3 (f)  | Y         |           | Y             |
| Oceanospirillales: Endozoicimonaceae_OTU5 (f)  | Y         |           |               |
| Oceanospirillales: Endozoicimonaceae_OTU6 (f)  | Y         |           |               |
| Oceanospirillales: Endozoicimonaceae_OTU7 (f)  | Y         |           |               |
| Oceanospirillales: Endozoicimonaceae_OTU8 (f)  |           | Y         |               |
| Rhodobacterales; Hyphomonadaceae (f)           |           | Y         |               |
| Vibrionales: Photobacterium angustum (s)       |           |           | Y             |

**TABLE S4** OTUs characteristic of healthy and diseased tissues as determined by SIMPER and signassoc analyses. The OTU label reflects the taxonomic assignment given by the QIIME pipeline.

| OTU label                                  | Health status overall | HBW vs DBW   | HTF vs DTF    | HPC vs DPC   |
|--------------------------------------------|-----------------------|--------------|---------------|--------------|
| Unassigned_OTU1                            | H: 4.8%, *            | HBW: 7.0%, * | HTF: 4.7%, -  | HPC: 2.7%, * |
| Unassigned_OTU2                            | H: 2.0%, -            | DBW: 2.8%, - |               | HPC: 2.0%, * |
| Unassigned_OTU6                            | H: <2%, ***           |              |               |              |
| Anaeroplasmatales: Anaeroplasmataceae_OTU1 | D: 2.2%, -            |              |               | DPC: 3.0%, - |
| Anaeroplasmatales: Anaeroplasmataceae_OTU2 |                       |              | DTF: 2.1%, -  | DPC: 2.3%, - |
| Campylobacteriales: Arcobacter             | D: <2%, **            |              |               |              |
| Enterobacteriales: Enterobacteriaceae      |                       |              |               | HPC: <2%, *  |
| Flavobacteriales: Flavobacterium           | H: 2.9%, ***          | HBW: 2.4%, - | HTF: 8.4%, -  |              |
| Lactobacillales: Streptococcus             |                       |              |               | HPC: <2%, *  |
| Rhizobiales                                |                       |              |               | HPC: <2%, *  |
| Rhodobacteriales: Hyphomonadaceae          | H: 4.6%, -            |              | HTF: 7.3%, -  |              |
| Oceanospirillales_OTU1                     | D: 3.9%, *            | DBW: 3.8%, - | DTF: 12.8%, * |              |
| Oceanospirillales_OTU2                     |                       | DBW: 3.1%, - |               |              |
| Oceanospirillales_OTU3                     |                       |              | DTF: 2.9%, *  |              |
| Oceanospirillales: Endozoicimonaceae_OTU1  | D: 3.4%, -            | DBW: 2.7%, - |               | DPC: 2.7%, - |
| Oceanospirillales: Endozoicimonaceae_OTU2  | D: 2.5%, -            | DBW: 2.3%, - |               | DPC: 2.1%, - |
| Oceanospirillales: Endozoicimonaceae_OTU3  | D: 2.7%, -            | DBW: 2.7%, - |               |              |

Entry format: health status with highest relative abundance: percentage of dissimilarity explained by SIMPER, significance level in signassoc analysis.

Abbreviations: H: healthy; D: diseased; HBW: healthy body wall; DBW: diseased body wall; HTF: healthy tube feet; DTF: diseased tube feet; HPC: healthy pyloric caeca; DPC: diseased pyloric caeca;

-:  $p > 0.05$ ; \*:  $p < 0.05$ ; \*\*:  $p < 0.01$ ; \*\*\*:  $p < 0.005$ .

**Table S5:** Metadata for individual *Acanthaster cf solaris* and their sampled tissues.

| Collection Date | Reef*          | Individuals   | Health status | Sampling Date | Tissues                             | Sample labels    |
|-----------------|----------------|---------------|---------------|---------------|-------------------------------------|------------------|
| 30.10.2013      | Arlington Reef | MG1, MG2      | Healthy       | 12.11.2013    | Gonad (testis)                      | MG1, MG2         |
| 26.03.2014      | Lark Reef      | D2            | Diseased      | 23.04.2014    | Body wall, Tube feet, Pyloric caeca | D2BW, D2TF, D2PC |
| 26.03.2014      | Lark Reef      | D6            | Diseased      | 29.04.2014    | Body wall, Tube feet, Pyloric caeca | D6BW, D6TF, D6PC |
| 26.03.2014      | Lark Reef      | D7            | Diseased      | 30.04.2014    | Body wall, Tube feet, Pyloric caeca | D7BW, D7TF, D7PC |
| 26.03.2014      | Lark Reef      | D8            | Diseased      | 06.05.2014    | Body wall, Tube feet, Pyloric caeca | D8BW, D8TF, D8PC |
| 26.03.2014      | Lark Reef      | D9            | Diseased      | 20.05.2014    | Body wall, Tube feet, Pyloric caeca | D9BW, D9TF, D9PC |
| 07.05.2014      | Mackay Reef    | H1            | Healthy       | 12.05.2014    | Body wall, Tube feet, Pyloric caeca | H1BW, H1TF, H1PC |
| 07.05.2014      | Mackay Reef    | H2            | Healthy       | 13.05.2014    | Body wall, Tube feet, Pyloric caeca | H2BW, H2TF, H2PC |
| 07.05.2014      | Mackay Reef    | H3            | Healthy       | 14.05.2014    | Body wall, Tube feet, Pyloric caeca | H3BW, H3TF, H3PC |
| 24.09.2014      | Rudder Reef    | MG3, MG4      | Healthy       | 17.11.2014    | Gonad (testis)                      | MG3, MG4         |
| 24.09.2014      | Rudder Reef    | FG1, FG2, FG3 | Healthy       | 17.11.2014    | Gonad (ovary)                       | FG1, FG2, FG3    |

\*All reefs are located in the Cooktoown/Lizard Island and Cairns sectors of the GB

**TABLE S6** Sequencing statistics. The filtering step included removal of chimeras, singletons, sequences that could not be aligned with PyNAST, and sequences assigned to OTUs detected in an extraction control at relative abundance > 0.05%.

| Sample | Total reads | Reads after qc | Reads after filtering |
|--------|-------------|----------------|-----------------------|
| H1BW   | 65884       | 48847          | 47049                 |
| H2BW   | 55391       | 42355          | 41282                 |
| H3BW   | 71088       | 51860          | 50301                 |
| D2BW   | 38725       | 28354          | 27391                 |
| D6BW   | 52766       | 37833          | 36305                 |
| D7BW   | 64360       | 44824          | 43270                 |
| D8BW   | 17145       | 12847          | 7824                  |
| D9BW   | 50356       | 15413          | 14920                 |
| H1TF   | 77807       | 57181          | 55026                 |
| H2TF   | 72644       | 56020          | 54446                 |
| H3TF   | 79524       | 58648          | 57156                 |
| D2TF   | 84236       | 62958          | 61152                 |
| D6TF   | 92124       | 67841          | 65392                 |
| D7TF   | 69584       | 49729          | 48419                 |
| D8TF   | 85258       | 63951          | 62581                 |
| D9TF   | 69777       | 22207          | 21421                 |
| H1PC   | 61834       | 25403          | 7852                  |
| H2PC   | 99246       | 48559          | 17548                 |
| H3PC   | 79071       | 34979          | 14398                 |
| D2PC   | 85491       | 41000          | 28737                 |
| D6PC   | 80404       | 32799          | 13496                 |
| D7PC   | 62362       | 24889          | 10289                 |
| D8PC   | 52773       | 29440          | 13693                 |
| D9PC   | 85496       | 21570          | 18255                 |
| FG1    | 69267       | 49013          | 45396                 |
| FG2    | 118694      | 38632          | 22945                 |
| FG3    | 93797       | 37881          | 11006                 |
| MG1    | 116187      | 67313          | 66553                 |
| MG2    | 76677       | 34530          | 33464                 |
| MG3    | 65305       | 52694          | 49921                 |
| MG4    | 73609       | 55536          | 53543                 |

Abbreviations: H: healthy; D: diseased; BW: body wall; TF: tube feet; PC: pyloric caeca; FG: female gonads; MG: male gonads. Numbers refer to the sampled CoTS individual.
